# Supplementary material for: Molecular Characterization of Mycoplasma pneumoniae Isolates in the United States from 2012 to 2018
Source: PubMed Central journal article supplement (PMC7512161; doi:10.1128/jcm.00710-20), 2020-09-22
Supplement: JCM.00710-20-s0001.pdf [file JCM.00710-20-s0001.pdf]

## **Supplementary materials:**

**Supplementary Figure 1.** P1 subtype variants. A). Partial sequences of variant 2h and 2i in RepMP2/3 region. Representative sequences of variant 2h (strain 72255) and variant 2i (strain 73192) were aligned with P1-2 reference sequence FH. B). Illustration of the P1 variants.

**Supplementary Figure 2.** Distribution of *p1* VNTRs with different copy numbers in: A) Upper or lower respiratory (URT or LRT) specimens ( $p < 0.001$ ); B) P1 subtypes ( $p = 0.002$ ); C). P1-2 variants groups ( $p = 0.032$ ); and D). MLVA type groups ( $p < 0.001$ ). \* Significant difference after Bonferroni correction.

**Supplementary Figure 3.** MLVA clustering of the 428 Mp strains by the unweighted pair group method with arithmetic mean (UPGMA) method. The information of the isolates, including isolate name, collection year, state, the clinical sources, P1 subtype, P1-2 variant type, and MLVA type are shown on the right. A cutoff value of 67% similarity was applied to define MLVA clusters (MC, named MC1 to 4). The colors used are based on MLVA clusters.

**Supplementary Figure 4.** Distribution of macrolide-susceptible and macrolide-resistant *M. pneumoniae* in different states. A). MLVA type 4-5-7-2 ( $p = 0.044$ ). B). MLVA type 3-5-6-2 ( $p = 0.001$ ). C). MLVA type 3-6-6-2 ( $p = 0.182$ ). \* Significant difference after Bonferroni correction.

**Supplementary Table 1.** Summary of the specimens.

**Supplementary Table 2.** Primers for P1 typing.

**Supplementary Table 3.** Comparison of the specimen types among different categories.

**Supplementary Table 4.** Comparison of the distributions of *p1* VNTR among different categories.

# Supplementary Figure 1.

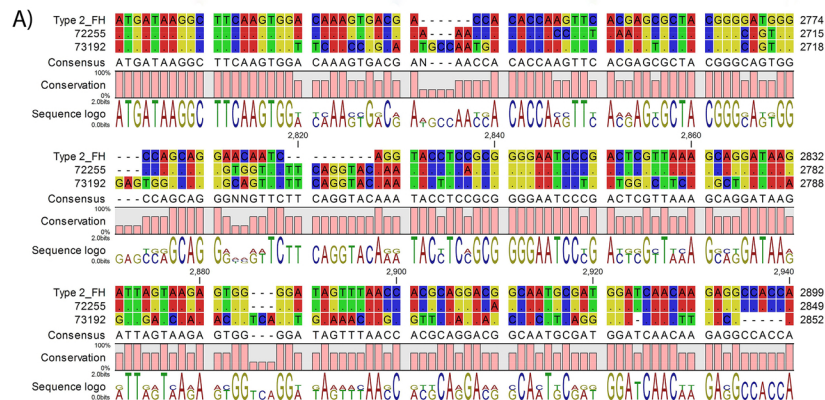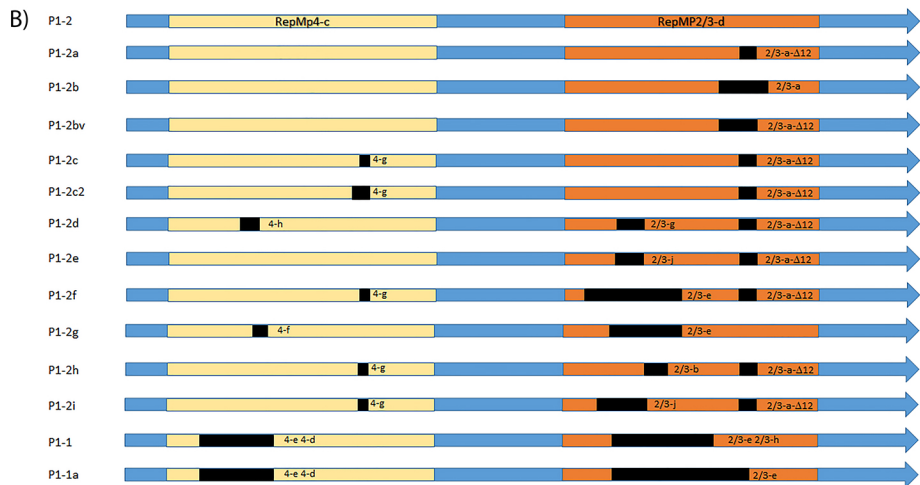

# Supplementary Figure 2

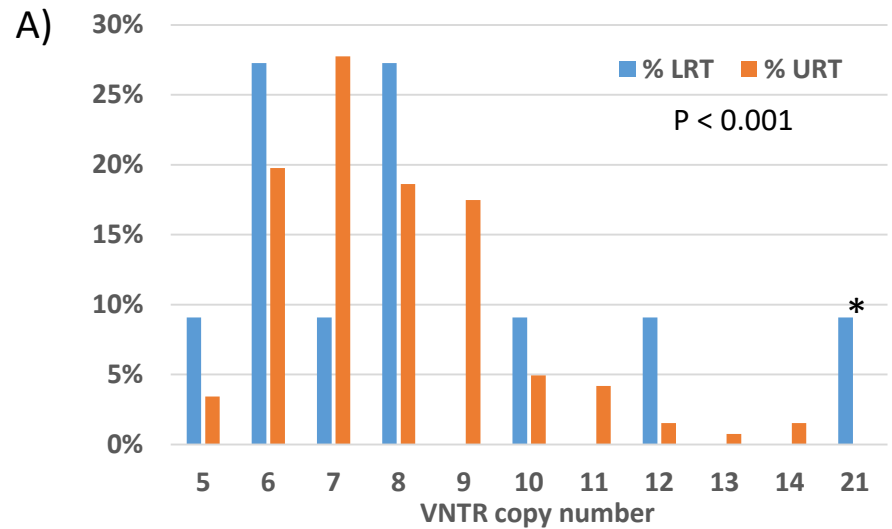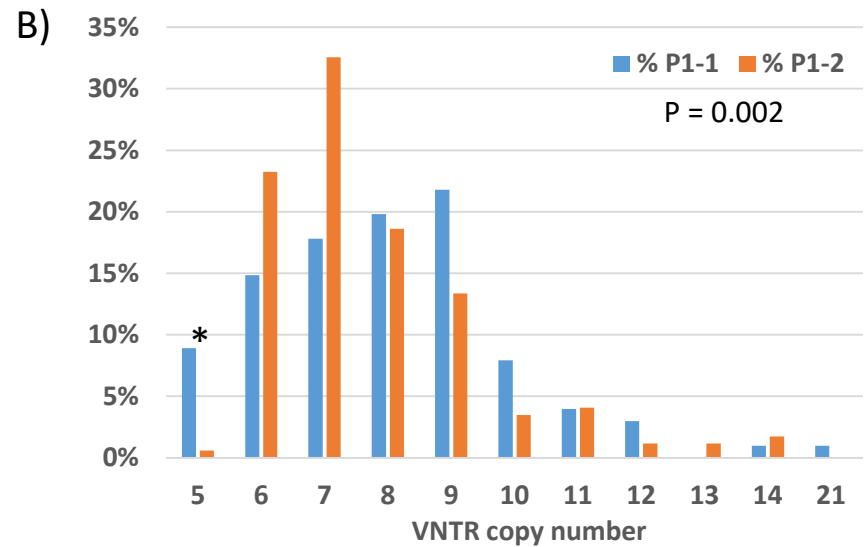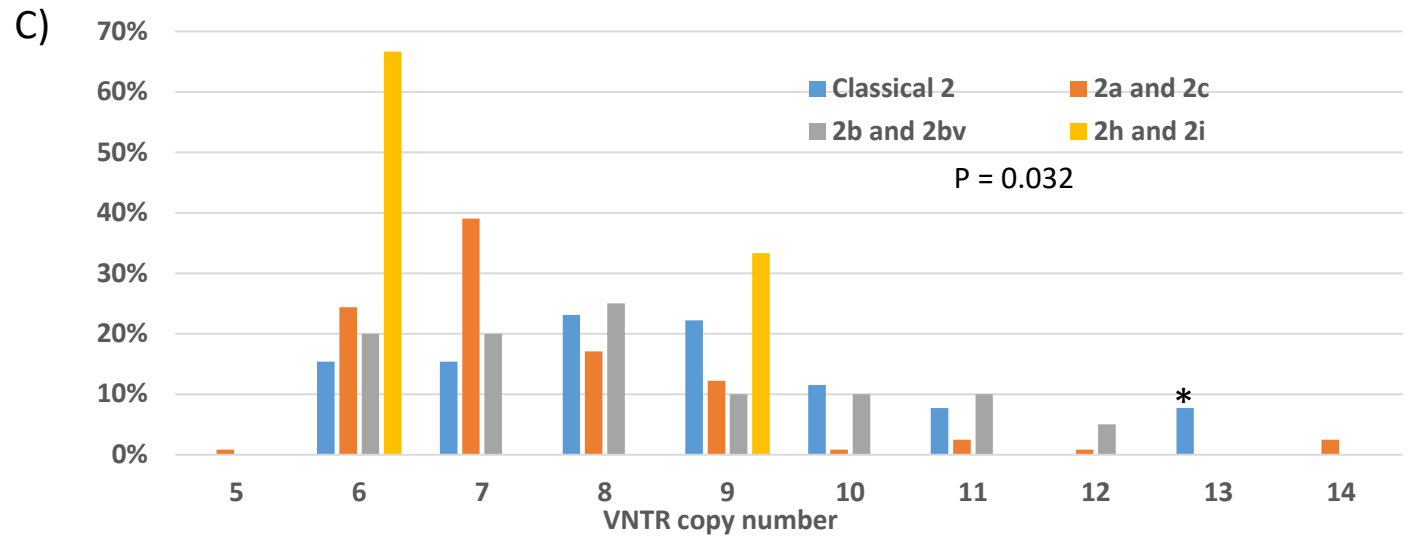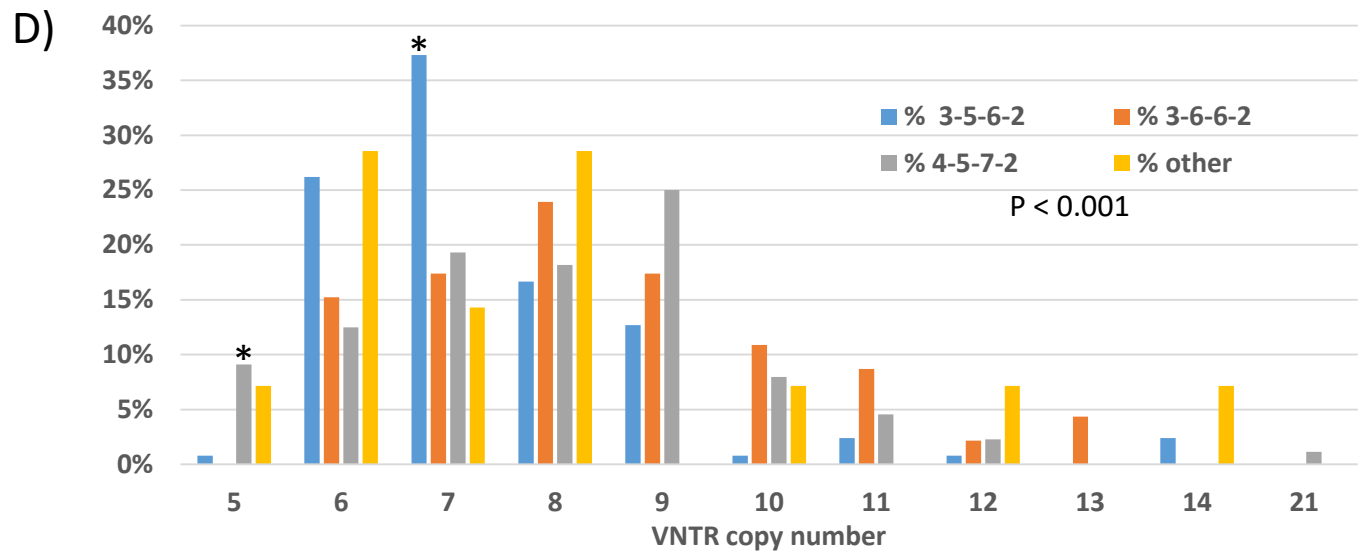



# Supplementary Figure 4

A)

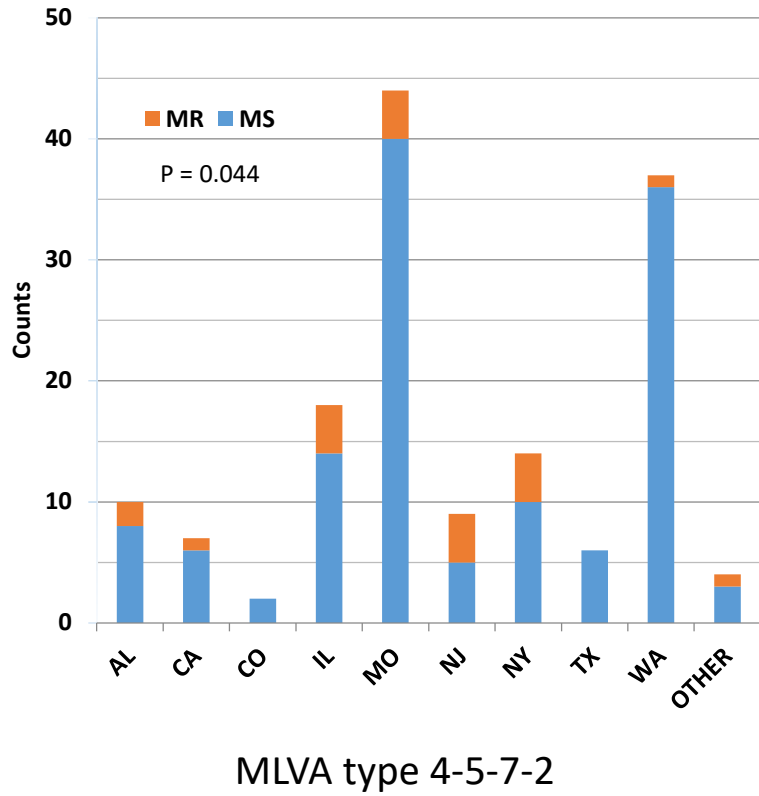

B)

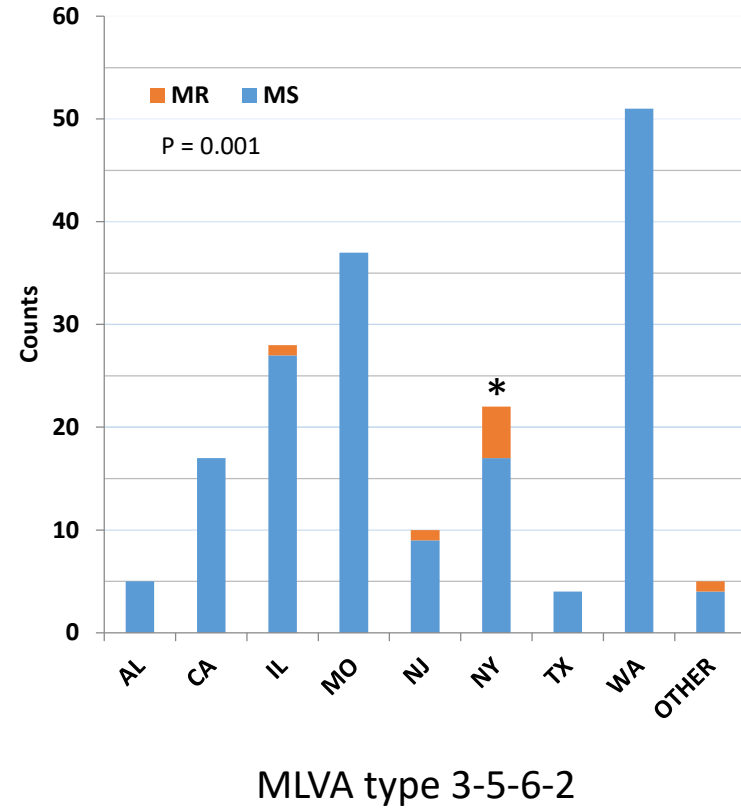

C)

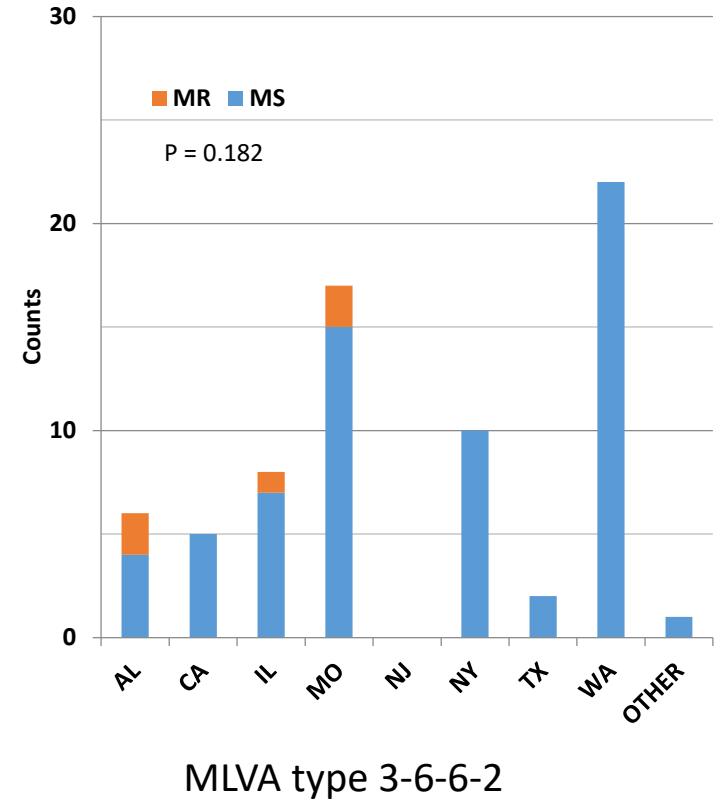

**Supplementary Table 1. Summary of the specimens.**

| Specimens                | Frequency | Percentage |
|--------------------------|-----------|------------|
| Upper respiratory track: | 420       | 94.2%      |
| Mid-turbinate swab       | 107       | 24.0%      |
| Nasal Aspirate/Wash      | 7         | 1.6%       |
| Nasopharyngeal swab      | 297       | 66.6%      |
| Oropharyngeal Swab       | 4         | 0.9%       |
| Throat swab              | 5         | 1.1%       |
| Lower respiratory track: | 24        | 5.4%       |
| Bronchoalveolar lavage   | 14        | 3.1%       |
| Sputum                   | 4         | 0.9%       |
| Tracheal aspirate        | 6         | 1.3%       |
| Blood                    | 1         | 0.2%       |
| Unspecified              | 1         | 0.2%       |
| Total                    | 446       | 100.0%     |

**Supplementary Table 2. Primers for P1 typing.**

| Purpose                | Primer | Sequence                 | Position  | Amplicon | Reference  |
|------------------------|--------|--------------------------|-----------|----------|------------|
| First Amplification    | ADH1   | CTGCCTTGTCCAAGTCCACT     | 20-39     | 2031     | (1)        |
|                        | ADH2   | AACCTTGTCTGGGAAGAGCTG    | 2031-2050 |          | (1)        |
|                        | Mp5f   | TTGACAAGACCGTCCAATCC     | 1992-2011 | 2456     | (2)        |
|                        | Mp16r  | TTGGTTGGGTATCTTGATCAGG   | 4456-4435 |          | (2)        |
| Nested PCR             | Mp705  | AATGTTTGGCTTGAAGGTGAAG   | 705-726   | 949      | This study |
|                        | ADH3R  | GTTGACCATGCCTGAGAACAGTAA | 1630-1653 |          |            |
|                        | Mp11f  | CCTCGTTGTCTCAGTGGCACC    | 3315-3333 | 533      | (2)        |
|                        | Mp14r  | GCTGGGTGGAATGGTCTGTAC    | 3847-3827 |          | (2)        |
| Sequencing: ADH1/ADH2  | ADH1   | CTGCCTTGTCCAAGTCCACT     | 20-39     |          | (1)        |
|                        | Mp705  | AATGTTTGGCTTGAAGGTGAAG   | 705-726   |          | This study |
|                        | Mp2cf1 | TGAAGAACGCCCAAGTGAA      | 1219-1237 |          | This study |
|                        | ADH3R  | GTTGACCATGCCTGAGAACAGTAA | 1630-1653 |          | (3)        |
| Sequencing: Mp5f/Mp16r | ADH2   | AACCTTGTCTGGGAAGAGCTG    | 2031-2050 |          | (1)        |
|                        | Mp5f   | TTGACAAGACCGTCCAATCC     | 1992-2011 |          | (2)        |
|                        | Mp6f   | GGGAATGGGTACAGGTATGGC    | 2434-2454 |          | (2)        |
|                        | Mp7f   | AGGCC CCAACTACACCAA      | 2882-2900 |          | (2)        |
|                        | Mp19r  | GTTCCGTCCTCGTGCTTG       | 4038-4019 |          | (2)        |

Reference:

1. Cousin-Allery A, Charron A, de Barbeyrac B, Fremy G, Skov Jensen J, Renaudin H, Bebear C. 2000. Molecular typing of *Mycoplasma pneumoniae* strains by PCR-based methods and pulsed-field gel electrophoresis. Application to French and Danish isolates. *Epidemiol Infect* 124:103-11.
2. Dumke R, Luck PC, Noppen C, Schaefer C, von Baum H, Marre R, Jacobs E. 2006. Culture-independent molecular subtyping of *Mycoplasma pneumoniae* in clinical samples. *J Clin Microbiol* 44:2567-70.
3. Kenri T, Okazaki N, Yamazaki T, Narita M, Izumikawa K, Matsuoka M, Suzuki S, Horino A, Sasaki T. 2008. Genotyping analysis of *Mycoplasma pneumoniae* clinical strains in Japan between 1995 and 2005: type shift phenomenon of *M. pneumoniae* clinical strains. *J Med Microbiol* 57:469-75.

**Supplementary Table 3. Comparison of specimen types among different categories.**

| Category                 | No. of patients | LRT, N (%) | URT, N (%) | P value |
|--------------------------|-----------------|------------|------------|---------|
| All specimens            | 444             | 24 (5.4)   | 420 (94.6) |         |
| States:                  |                 |            |            | <0.001  |
| AL <sup>a</sup>          | 26              | 17 (70.8)  | 9 (2.2)    |         |
| CA                       | 36              | 3 (12.5)   | 33 (8.1)   |         |
| CO <sup>a</sup>          | 1               | 1 (4.2)    | 0 (0)      |         |
| IL                       | 58              | 0 (0)      | 58 (14.3)  |         |
| MO                       | 104             | 3 (12.5)   | 101 (24.8) |         |
| NJ                       | 23              | 0 (0)      | 23 (5.7)   |         |
| NY                       | 48              | 0 (0)      | 48 (11.8)  |         |
| TX                       | 13              | 0 (0)      | 13 (3.2)   |         |
| WA <sup>a</sup>          | 122             | 0 (0)      | 122 (30.0) |         |
| Total                    | 431             | 24 (5.6)   | 407 (94.4) |         |
| Regions:                 |                 |            |            | <0.001  |
| South/East <sup>a</sup>  | 97              | 17 (70.8)  | 81 (19.9)  |         |
| Middle                   | 176             | 4 (16.7)   | 172 (42.3) |         |
| West                     | 158             | 3 (12.5)   | 155 (38.1) |         |
| Total                    | 431             | 24 (5.6)   | 407 (94.4) |         |
| Year:                    |                 |            |            | <0.001  |
| 2012                     | 15              | 0 (0)      | 15 (3.6)   |         |
| 2013                     | 52              | 0 (0)      | 52 (12.4)  |         |
| 2014 <sup>a</sup>        | 18              | 4 (18.2)   | 14 (3.3)   |         |
| 2015                     | 120             | 6 (27.3)   | 114 (27.3) |         |
| 2016                     | 97              | 7 (31.8)   | 90 (21.5)  |         |
| 2017                     | 92              | 4 (18.2)   | 88 (21.1)  |         |
| 2018                     | 46              | 1 (4.5)    | 45 (10.8)  |         |
| Total                    | 440             | 22 (5.0)   | 418 (95.0) |         |
| Macrolide resistance:    |                 |            |            | 0.439   |
| Resistant                | 37              | 3 (12.5)   | 34 (8.1)   |         |
| Susceptible              | 407             | 21 (87.5)  | 386 (91.9) |         |
| Total                    | 444             | 24 (5.4)   | 420 (94.6) |         |
| P1 subtype:              |                 |            |            | 0.074   |
| P1-1                     | 169             | 13 (59.1)  | 156 (38.9) |         |
| P1-2                     | 254             | 9 (40.9)   | 245 (61.1) |         |
| Total                    | 423             | 22 (5.2)   | 401 (94.8) |         |
| P1-2 variant (N=254):    |                 |            |            | 0.026   |
| Classical 2 <sup>a</sup> | 38              | 5 (55.6)   | 33 (13.5)  |         |
| 2a                       | 8               | 1 (11.1)   | 7 (2.9)    |         |
| 2a/2c                    | 3               | 0 (0)      | 3 (1.2)    |         |
| 2b                       | 18              | 1 (11.1)   | 17 (6.9)   |         |



|                          |     |          |            |       |
|--------------------------|-----|----------|------------|-------|
| 2bv                      | 20  | 0 (0)    | 20 (8.2)   |       |
| 2c                       | 164 | 2 (22.2) | 162 (66.1) |       |
| 2h                       | 2   | 0 (0)    | 2 (0.8)    |       |
| 2i                       | 1   | 0 (0)    | 1 (0.4)    |       |
| Total                    | 254 | 9 (3.5)  | 245 (96.5) |       |
| P1-2 variant groups:     |     |          |            | 0.007 |
| Classical 2 <sup>a</sup> | 38  | 5 (55.6) | 33 (13.5)  |       |
| 2a and 2c                | 175 | 3 (33.3) | 172 (70.2) |       |
| 2b and 2bv               | 38  | 1 (11.1) | 37 (15.1)  |       |
| 2h and 2i                | 3   | 0 (0)    | 3 (1.2)    |       |
| Total                    | 254 | 9 (3.5)  | 245 (96.5) |       |
| MLVA type:               |     |          |            | 0.792 |
| 2-5-7-2                  | 1   | 0 (0)    | 1 (0.2)    |       |
| 3-5-6-1                  | 1   | 0 (0)    | 1 (0.2)    |       |
| 3-5-6-2                  | 179 | 6 (30)   | 173 (42.6) |       |
| 3-5-6-3                  | 1   | 0 (0)    | 1 (0.2)    |       |
| 3-5-7-1                  | 1   | 0 (0)    | 1 (0.2)    |       |
| 3-5-7-2                  | 3   | 0 (0)    | 1 (0.2)    |       |
| 3-6-6-2                  | 71  | 3 (15)   | 68 (16.7)  |       |
| 3-6-7-2                  | 3   | 1 (5)    | 3 (0.7)    |       |
| 4-4-7-3                  | 2   | 0 (0)    | 2 (0.5)    |       |
| 4-5-3-2                  | 1   | 0 (0)    | 1 (0.2)    |       |
| 4-5-7-2                  | 150 | 9 (45)   | 141 (34.7) |       |
| 4-5-7-3                  | 6   | 1 (5)    | 5 (1.2)    |       |
| 4-5-8-2                  | 3   | 0 (0)    | 3 (0.7)    |       |
| 4-6-7-2                  | 3   | 0 (0)    | 3 (0.7)    |       |
| 5-5-7-2                  | 1   | 0 (0)    | 1 (0.2)    |       |
| Total                    | 426 | 20 (4.7) | 406 (95.3) |       |
| MLVA type groups:        |     |          |            | 0.604 |
| 3-5-6-2                  | 179 | 6 (30)   | 173 (42.6) |       |
| 3-6-6-2                  | 71  | 3 (15)   | 68 (16.7)  |       |
| 4-5-7-2                  | 150 | 9 (45)   | 141 (34.7) |       |
| Others                   | 26  | 2 (10)   | 24 (5.9)   |       |
| Total                    | 426 | 20 (4.7) | 406 (95.3) |       |

Notes: URT, upper respiratory track; LRT, lower respiratory track; <sup>a</sup>. Significant after Bonferroni correction.



|                      |            |                |           |                 |           |           |                |          |                |                |                |         |
|----------------------|------------|----------------|-----------|-----------------|-----------|-----------|----------------|----------|----------------|----------------|----------------|---------|
| Resistant            | 19 (6.9)   | 1              | 4         | 3               | 4         | 4         | 2              | 0        | 1              | 0              | 0              | 0       |
| Susceptible          | 255 (93.1) | 9              | 51        | 71              | 48        | 42        | 12             | 11       | 4              | 2              | 4              | 1       |
| Total                | 274        | 10 (3.6)       | 55 (20.1) | 74 (27.0)       | 52 (19.0) | 46 (16.8) | 14 (5.1)       | 11 (4.0) | 5 (1.8)        | 2 (0.7)        | 4 (1.5)        | 1 (0.4) |
| P1 subtypes:         |            |                |           |                 |           |           |                |          |                |                |                |         |
| P1-1                 | 101 (36.9) | 9 <sup>a</sup> | 15        | 18              | 20        | 22        | 8              | 4        | 3              | 0              | 1              | 1       |
| P1-2                 | 173 (63.1) | 1 <sup>a</sup> | 40        | 56              | 32        | 24        | 6              | 7        | 2              | 2              | 3              | 0       |
| Total                | 274        | 10 (3.6)       | 55 (20.1) | 74 (27.0)       | 52 (19.0) | 46 (16.8) | 14 (5.1)       | 11 (4.0) | 5 (1.8)        | 2 (0.7)        | 4 (1.5)        | 1 (0.4) |
| P1-2 variants:       |            |                |           |                 |           |           |                |          |                |                |                |         |
| Classical 2          | 27 (15.6)  | 0              | 4         | 4               | 6         | 6         | 3              | 2        | 0              | 2              | 0              | 0       |
| 2a                   | 3 (1.7)    | 0              | 0         | 1               | 1         | 1         | 0              | 0        | 0              | 0              | 0              | 0       |
| 2b                   | 7 (4.0)    | 0              | 2         | 1               | 2         | 1         | 1              | 0        | 0              | 0              | 0              | 0       |
| 2bv                  | 13 (7.5)   | 0              | 2         | 3               | 3         | 1         | 1              | 2        | 1              | 0              | 0              | 0       |
| 2c                   | 120 (69.4) | 1              | 30        | 47              | 20        | 14        | 1              | 3        | 1              | 0              | 3              | 0       |
| 2h                   | 2 (1.2)    | 0              | 2         | 0               | 0         | 0         | 0              | 0        | 0              | 0              | 0              | 0       |
| 2i                   | 1 (0.6)    | 0              | 0         | 0               | 0         | 1         | 0              | 0        | 0              | 0              | 0              | 0       |
| Total                | 173        | 1 (0.6)        | 40 (23.1) | 56 (32.4)       | 32 (18.5) | 24 (13.9) | 6 (3.5)        | 7 (4.0)  | 2 (1.2)        | 2 (1.2)        | 3 (1.7)        | 0 (0.0) |
| P1-2 variant groups: |            |                |           |                 |           |           |                |          |                |                |                |         |
| Classical 2          | 27 (15.6)  | 0              | 4         | 4               | 6         | 6         | 3              | 2        | 0              | 2 <sup>a</sup> | 0              | 0       |
| 2a and 2c            | 123 (71.1) | 1              | 30        | 48              | 21        | 15        | 1              | 3        | 1              | 0              | 3              | 0       |
| 2b and 2bv           | 20 (11.6)  | 0              | 4         | 4               | 5         | 2         | 2              | 2        | 1              | 0              | 0              | 0       |
| 2h and 2i            | 3 (1.7)    | 0              | 2         | 0               | 0         | 1         | 0              | 0        | 0              | 0              | 0              | 0       |
| Total                | 173        | 1 (0.6)        | 40 (23.1) | 56 (32.4)       | 32 (18.5) | 24 (13.9) | 6 (3.5)        | 7 (4.0)  | 2 (1.2)        | 2 (1.2)        | 3 (1.7)        | 0 (0.0) |
| MLVA types:          |            |                |           |                 |           |           |                |          |                |                |                |         |
| 3-5-6-2              | 126 (46.0) | 1              | 33        | 47 <sup>a</sup> | 21        | 16        | 1              | 3        | 1              | 0              | 3              | 0       |
| 3-5-6-3              | 1 (0.4)    | 0              | 0         | 1               | 0         | 0         | 0              | 0        | 0              | 0              | 0              | 0       |
| 3-5-7-2              | 2 (0.7)    | 1              | 0         | 0               | 1         | 0         | 0              | 0        | 0              | 0              | 0              | 0       |
| 3-6-6-2              | 46 (16.8)  | 0              | 7         | 8               | 11        | 8         | 5              | 4        | 1              | 2              | 0              | 0       |
| 3-6-7-2              | 2 (0.7)    | 0              | 1         | 0               | 0         | 0         | 0              | 0        | 1 <sup>a</sup> | 0              | 0              | 0       |
| 4-4-7-3              | 1 (0.4)    | 0              | 0         | 0               | 1         | 0         | 0              | 0        | 0              | 0              | 0              | 0       |
| 4-5-3-2              | 1 (0.4)    | 0              | 0         | 0               | 0         | 0         | 1 <sup>a</sup> | 0        | 0              | 0              | 0              | 0       |
| 4-5-7-2              | 88 (32.1)  | 8              | 11        | 17              | 16        | 22        | 7              | 4        | 2              | 0              | 0              | 1       |
| 4-5-7-3              | 4 (1.5)    | 0              | 3         | 0               | 0         | 0         | 0              | 0        | 0              | 0              | 1 <sup>a</sup> | 0       |
| 4-5-8-2              | 1 (0.4)    | 0              | 0         | 0               | 1         | 0         | 0              | 0        | 0              | 0              | 0              | 0       |
| 4-6-7-2              | 2 (0.7)    | 0              | 0         | 1               | 1         | 0         | 0              | 0        | 0              | 0              | 0              | 0       |

0.002

0.315

0.032

&lt;0.001

|                   |            |                |           |                 |           |           |          |          |         |         |         |         |        |
|-------------------|------------|----------------|-----------|-----------------|-----------|-----------|----------|----------|---------|---------|---------|---------|--------|
| Total             | 274        | 10 (3.6)       | 55 (20.1) | 74 (27.0)       | 52 (19.0) | 46 (16.8) | 14 (5.1) | 11 (4.0) | 5 (1.8) | 2 (0.7) | 4 (1.5) | 1 (0.4) |        |
| MLVA type groups: |            |                |           |                 |           |           |          |          |         |         |         |         | <0.001 |
| 3-5-6-2           | 126 (46.0) | 1              | 33        | 47 <sup>a</sup> | 21        | 16        | 1        | 3        | 1       | 0       | 3       | 0       |        |
| 3-6-6-2           | 46 (16.8)  | 0              | 7         | 8               | 11        | 8         | 5        | 4        | 1       | 2       | 0       | 0       |        |
| 4-5-7-2           | 88 (32.1)  | 8 <sup>a</sup> | 11        | 17              | 16        | 22        | 7        | 4        | 2       | 0       | 0       | 1       |        |
| Others            | 14 (5.1)   | 1              | 4         | 2               | 4         | 0         | 1        | 0        | 1       | 0       | 1       | 0       |        |
| Total             | 274        | 10 (3.6)       | 55 (20.1) | 74 (27.0)       | 52 (19.0) | 46 (16.8) | 14 (5.1) | 11 (4.0) | 5 (1.8) | 2 (0.7) | 4 (1.5) | 1 (0.4) |        |

Notes: URT, upper respiratory track; LRT, lower respiratory track; <sup>a</sup>. Significant after Bonferroni correction.
